# Supplementary material
Source: PubMed Central journal article supplement (PMC4715728)
Supplement: NIHMS744239-supplement-1.pdf [file NIHMS744239-supplement-1.pdf]

**Comprehensive Supplemental Information Document**

**DGK $\theta$  catalytic activity is required for efficient recycling of presynaptic vesicles at excitatory synapses**

Hana L. Goldschmidt, Becky Tu-Sekine, Lenora Volk, Victor Anggono, Richard L. Huganir and Daniel M. Raben

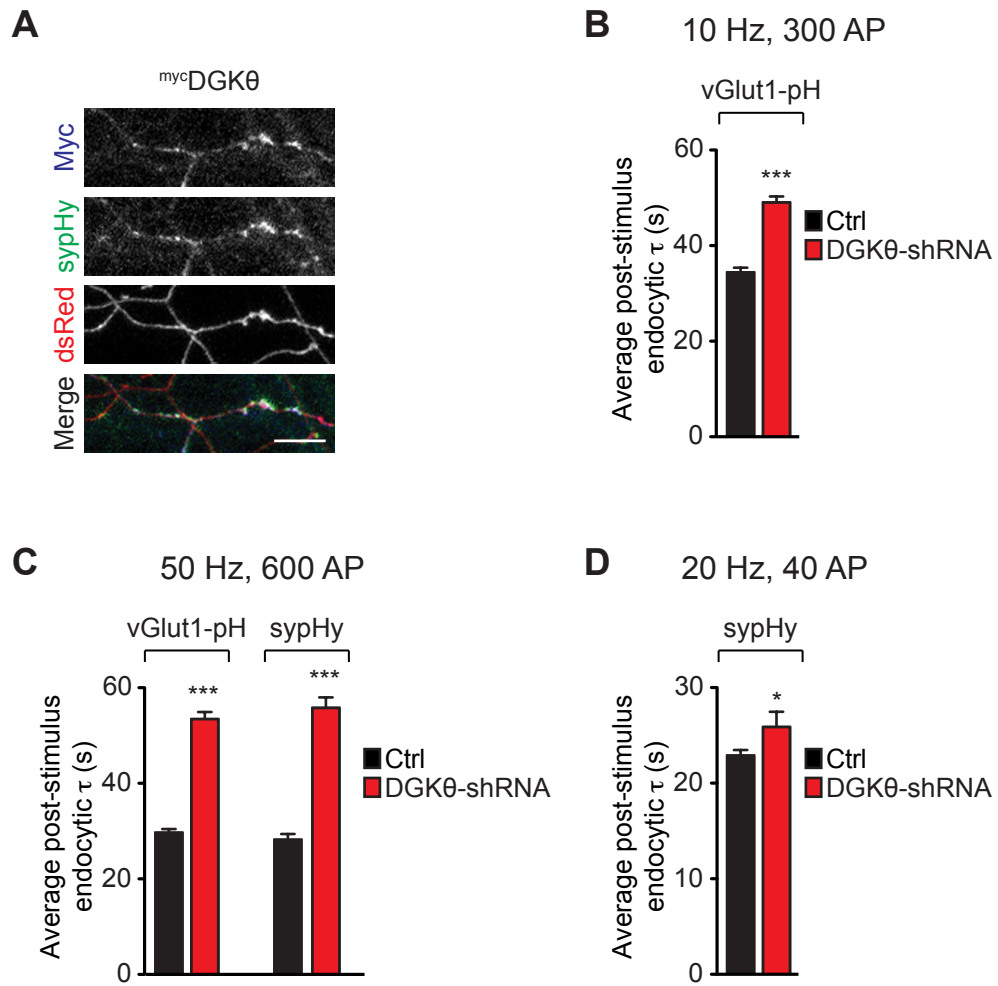

Figure S1 (related to Figure 2)

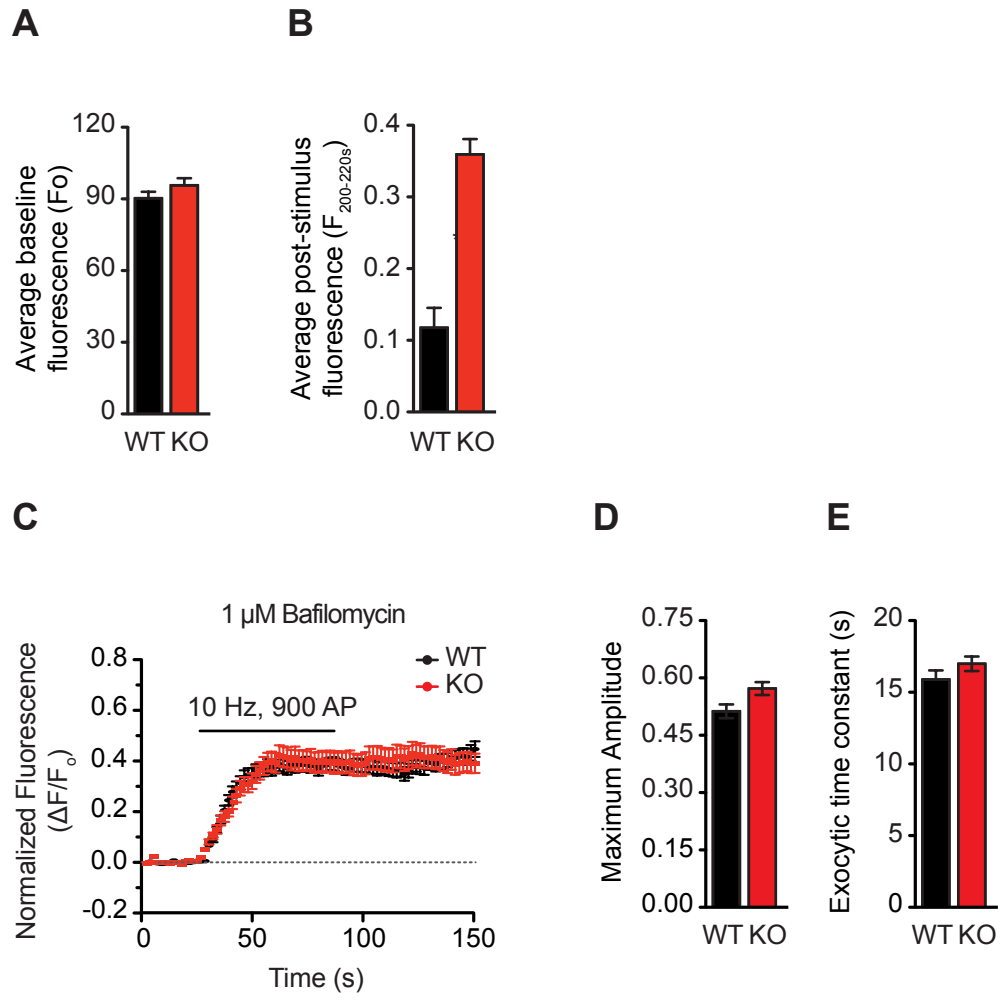

Figure S2 (related to Figure 4)

## Supplementary Figure Legends

**Figure S1, Related to Figure 2.** SV recycling kinetics measured with vGlut1-pHluorin are slower in DGK $\theta$ -knockdown neurons.

**(A)** Cultured cortical neurons transfected with <sup>myc</sup>DGK $\theta$ , sypHy, and mCherry were and immunostained with specific antibodies against Myc (<sup>myc</sup>DGK $\theta$ , blue), GFP (sypHy, green) and dsRED (mCherry). The overlap between the Myc and GFP signals along neuronal processes indicates <sup>myc</sup>DGK $\theta$  rescues SV recycling kinetics (**Figure 2**) in DGK $\theta$ -shRNA expressing neurons at synaptic sites. Scale bar, 5 $\mu$ m.

**(B)** Comparison of average post-stimulus endocytic time constants ( $\tau$ ) values measured using the vGlut1-pHluorin reporter (vGlut1-pH) between control (Ctrl, black) and DGK $\theta$ -shRNA (red) in response to a train of 300 APs (10Hz). Data represent mean  $\pm$  SEM from >300 boutons for each condition. Student's t test, \*\*\* P<0.001 against Ctrl.

**(C)** Comparison of average  $\tau$  values measured using either vGlut1-pH or sypHy between control (Ctrl, black) and DGK $\theta$ -shRNA (red) in response to a train of 600 APs (50Hz). Data represent mean  $\pm$  SEM from >300 boutons (vGlut1-pH) and >100 boutons (sypHy) for each condition; \*\*\* P<0.001 against Ctrl with vGlut1-pH.

### P<0.001 against Ctrl with sypHy, a one-way analysis of variance (ANOVA) with Tukey's *post-hoc* test.

**(D)** Comparison of average  $\tau$  values measured using sypHy between control (Ctrl, black) and DGK $\theta$ -shRNA (red) in response to a train of 40 APs (20Hz). Data represent mean  $\pm$  SEM from >300 boutons for each condition. Student's t test, \* P = 0.04 against Ctrl.

**Figure S2, Related to Figure 4.** DGK $\theta$  regulates the retrieval of SV proteins following elevated neuronal activity.

**(A)** Comparison of the average sypHy fluorescence intensity values during the 20 s prior to stimulation ( $F_0$ ) measured in WT (black) and KO (red) neurons.  $F_0$  values were corrected for differences in background fluorescence by subtracting the average fluorescence values from 3 ROIs selected in regions of the imaging area that were not on neuronal processes (indicated by mCherry fluorescence). There was no significant (ns) difference in the average  $F_0$  between WT and KO neurons (Student's t test). Data represent mean  $\pm$  SEM from >500 boutons per genotype.

**(B)** Average sypHy fluorescence intensity is significantly higher in DGK $\theta$  KO neurons >2 minutes following termination of a train of 600APs (50Hz). Values were first normalized to  $F_0$  and the average fluorescence intensities were calculated from 10 frames (20 s) 160 s following the end of the 50 Hz stimulus ( $F_{200-220s}$ ). Data represent mean  $\pm$  SEM from >160 boutons per genotype; Student's t test.

**(C)** DGK $\theta$  KO neurons show no significant difference in the kinetics of SV exocytosis compared to WT. Average traces of sypHy fluorescence in WT and KO neurons in response to a train of 900 APs (10Hz) delivered in the presence of bafilomycin A1 (baf). Values were normalized to the average baseline before stimulation ( $F_0$ , as in described in **(A)**). Representative traces from 1 coverslip of each genotype are shown; data represent mean from  $\pm$  SEM from >100 boutons per genotype.

**(D)** Comparison of the average maximum sypHy amplitudes between WT and KO neurons in response to a train of 900 APs (10Hz) delivered in the presence of bafilomycin. Values were calculated from  $\Delta F/F$  curves (example traces shown in **(C)**). There was no significant difference between sypHy amplitudes measured in WT and KO neurons. Data represent mean  $\pm$  SEM from  $\geq$ 300 boutons per genotype, Student's t test.

**(E)** Exocytic rate constants for WT and KO neurons were determined by first normalizing  $\Delta F/F$  traces for each ROI to the maximum sypHy amplitude (0-1 scale). Tau values were calculated by fitting the rise-portion of the response during stimulation to a one-phase association curve. Tau values measured in WT and KO neurons were not significantly different. Data represent mean  $\pm$  SEM from  $\geq 300$  boutons per genotype, Student's t test.

## Detailed Supplementary Experimental Procedures

### *Reagents*

Imaging reagents: TTX, DL-AP5, and CNQX (Tocris), were resuspended with water to make 1000x stock solutions (1 mM, 50 mM, 10 mM, respectively), aliquots were stored at -20°C until use. Bafilomycin A1 (Calbiochem) was resuspended in DMSO to make 1mM stock solution, aliquots were stored at -20°C until use. Antibodies: mouse anti-DGK $\theta$ , DGK $\iota$ , DGK $\gamma$  from BD biosciences, chicken anti-MAP2 (Novus), mouse anti-PSD-95 (NeuroMab), guinea pig anti-vGlut1 (Synaptic systems), mouse  $\beta$ -Tubulin (Sigma), rabbit anti-GluR1 (RLH lab), rabbit anti-dsRed (Clontech), chicken anti-GFP (Abcam). IRDye-conjugated secondary antibodies were used for infrared imaging (Odyssey; LICOR).

### *DNA constructs (Molecular Biology)*

*shRNA-knockdown and rescue plasmids.* Complementary primers containing DGK $\theta$  or control shRNA (Ctrl) sequences were annealed and cloned into *SacI* and *XhoI* sites of pSuper vector and driven by H1 RNA polymerase III promoter. Ctrl shRNA sequence was specific for luciferase. shRNA targeting sequences: DGK $\theta$ -shRNA (Baldanzi et al., 2010), 5'- GTGTACATTTGGACGTCTA -3'; luciferase shRNA, 5'- CGCTGAGTACTTCGAAATGTC -3'. For rescue experiments, human DGK $\theta$  or DGK $\theta$ -kinase dead (DGK $\theta$ -kd, point-mutation G648A in kinase domain (Los et al., 2004)) was subcloned into pRK5-Myc between *SalI* and *NotI* restriction sites and driven by CMV promoter (<sup>Myc</sup>DGK $\theta$  and <sup>Myc</sup>DGK $\theta$ -kd, respectively). vGlut1-pHluorin was subcloned into pRK5 from a lentiviral vector (Beijing University). All constructs were verified by restriction enzyme digest and DNA sequencing. Other DNA plasmids used: synaptophysin-pHluorin (CMV::SypHy A4) was obtained from Addgene (plasmid 24478).

### *Lentivirus*

Control and DGK $\theta$ -shRNA were subcloned into FuGW lentiviral vector and lentivirus was produced as described previously (Anggono et al., 2011). Briefly, HEK 293 cells were transfected with FuGW,  $\Delta$ 8.9, VSV-G, using lipofectamine 2000. Cells were treated with sodium butyrate 18hrs post-transfection, Virus was collected 8hrs, and 24hrs post treatment. Virus was concentrated, and resuspended in NB, aliquots were frozen and stored at -80C. For DGK $\theta$  knockdown experiments, rat cortical neurons were infected with control or DGK $\theta$ -shRNA lentivirus DIV 8, and lysates were assayed by western blot DIV 14-16.

### *Immunocytochemistry*

Neurons were rinsed with PBS and fixed for 15 minutes at room temperature in PBS containing 4% paraformaldehyde (PFA) and 4% sucrose. Cells were washed 3 times and permeabilized with 0.25% TX-100 in PBS for 10 minutes. Neurons were then blocked with 10% BSA serum in PBS for 1hr at 37°C and incubated in primary antibodies in PBS containing 3% BSA at room temperature. Neurons were washed 5 times before they were incubated with fluorescently labeled secondary antibodies (goat conjugated Alexafluor 647, 568, or 488). Following 5 final washes with PBS, coverslips and mounted onto glass slides using Fluoromount-G (Southern Biotech). Images were obtained using a 510-laser scanning confocal microscope (Zeiss).

### *DGK activity assay*

Assay was performed as described previously (Tu-Sekine and Raben, 2012). Large unilamellar vesicles were prepared on the day of assay as follows: stock lipids were



combined, dried under nitrogen and stored under vacuum at 4° C for 2-20 hours to remove residual CHCl<sub>3</sub>. Lipid films were rehydrated in DGK assay buffer (55 mM Hepes, 100 mM NaCl) for 30 min at 40°C with occasional vortexing and sonication (30 seconds, Branson Sonicator). Vesicles were formed at 37-40C by extrusion through a 0.1µm polycarbonate membrane using an Avanti mini extruder per manufacturer instructions. Lipid composition was POPC:POPE:POPS:DOG at mole fractions of 26:51:15:8, respectively. 5µg of S1 fractions were added to the vesicles and reactions were incubated 30 min at 37C without agitation. The final assay contained: 1.2 mM total lipid in 50 mM Hepes pH 7.5, 1 mM DTT, 1.5 mM MgCl<sub>2</sub>, 1 mM [ $\gamma$ <sup>32</sup>P]ATP (specific activity = 2.5x10<sup>5</sup> cpm/nmol ATP). Reactions were terminated by addition of chloroform/methanol/1M NaCl (1:2:0.8) (v:v), and phases separated by addition of 1 ml each of CHCl<sub>3</sub> and 1M NaCl. The organic phase was washed with 2 ml of 1M NaCl, dried under nitrogen gas, resuspended in CHCl<sub>3</sub>:MeOH (95:5) and spotted onto a silica gel 60 TLC plate. Phosphatidic acid (PtdOH) was separated from other lipids with chloroform:acetone:methanol:acetic acid:water (10:4:3:2:1) (v:v). The amount of [ $\gamma$ <sup>32</sup>P]PtdOH was measured by liquid scintillation spectrophotometry in a Wallac 1410 liquid scintillation counter. DGK activity was quantified as nmol PtdOH min<sup>-1</sup> µg<sup>-1</sup> of protein. Assay conditions used in these experiments are routinely used to measure DGK activity of purified forms of DGK $\theta$ , DGK $\zeta$ , and DGK $\delta$  (personal communication from Becky Tu-Sekine). By excluding calcium from the DGK assay buffer, we minimized activity measured in cell fraction from the type I DGK isoforms (- $\alpha$ , - $\beta$ , and - $\gamma$ ).

#### *PSD preparation*

Forebrain or whole brain was isolated from adult mouse and frozen on dry ice. Brain was thawed in homogenization buffer (320 mM sucrose, 5 mM sodium pyrophosphate, 1 mM

EDTA, 10 mM HEPES pH 7.4, 200 nM okadaic acid, protease inhibitor cocktail (Roche)) and homogenized 30 times in glass homogenizer. The homogenate was centrifuged at 800xg for 10 minutes at 4°C to yield P1 and S1. S1 was further centrifuged at 10,000xg for 20 minutes at 4°C to yield P2 and S2. P2 was layered on top of a sucrose gradient composed of 0.8, 1, 1.2 mM sucrose buffers, respectively, containing protease and phosphatase inhibitors. The gradient was centrifuged 82,500 xg for 2hrs at 4°C . The layer containing synaptosomes (between 1 and 1.2mM sucrose) was isolated, diluted with 10mM Hepes buffer, pH 7.4, and synaptosomes were pelleted by centrifugation at 150,000 x g for 30 minutes at 4°C. Synaptosomal pellet (SYN) was resuspended in 50mM HEPES pH 7.4, mixed with an equal volume of 1% triton X-100, and incubated with agitation at 4°C for 15 minutes. The PSD was generated by centrifugation at 32,000xg for 20 minutes at 4°C. The final PSD pellet was resuspended in 50mM HEPES pH 7.4 followed by protein quantification and western blot.

#### *Live cell imaging and analysis*

Neurons were transfected DIV 11-12 using lipofectamine 2000 (Invitrogen) and sypHy live-cell imaging was performed DIV 14-20. Concentration of DNAs used are as follows: 1 µg sypHy or vGlut1-pH, 0.4 µg mCherry, 0.5 µg empty vector (pRK5-Myc) or <sup>Myc</sup>DGKθ, or <sup>Myc</sup>DGKθ-kd; for shRNA-knockdown 1 µg of control or DGKθ-specific shRNA (shLuc and sh#1, respectively) was also included.

Coverslips containing neurons were mounted into a custom-built perfusion and stimulation chamber which held at 37°C on the heated microscope stage. Healthy, transfected neurons were identified by mCherry expression. During image acquisition, cells were continuously perfused at 0.5-1.0 mL/min with pre-warmed ACSF. In all experiments, images were acquired for 30 s prior to stimulation to establish a stable baseline.

Images were analyzed in ImageJ (<http://rsb.info.nih.gov/ij/>) using the time-series plugin (<http://rsb.info.nih.gov/ij/plugins/time-series.html>).  $\tau$  values were calculated from fluorescence intensity changes individual boutons ( $\geq 3$  coverslips per genotype, from  $\geq 3$  batches of neurons). Values were normalized to the initial baseline,  $\Delta F/F_0$ , ( $F_0$  = average F values 20 s prior to stimulation) and then normalized to their maximum amplitude ( $\Delta F$ ).  $\tau$  values were calculated by fitting the decay phase for each  $\Delta F$  trace (corresponding to 1 bouton) to a single exponential function in Prism 5.

### **Supplemental References**

Anggono, V., Clem, R.L., and Huganir, R.L. (2011). PICK1 loss of function occludes homeostatic synaptic scaling. *J. Neurosci.* *31*, 2188–2196.

Baldanzi, G., Alchera, E., Imarisio, C., Gaggianesi, M., Dal Ponte, C., Nitti, M., Domenicotti, C., van Blitterswijk, W.J., Albano, E., Graziani, A., et al. (2010). Negative regulation of diacylglycerol kinase theta mediates adenosine-dependent hepatocyte preconditioning. *Cell Death and Differentiation* *17*, 1059–1068.

Los, A.P., van Baal, J., de Widt, J., Divecha, N., and van Blitterswijk, W.J. (2004). Structure-activity relationship of diacylglycerol kinase theta. *Biochim. Biophys. Acta* *1636*, 169–174.

Tu-Sekine, B., and Raben, D.M. (2012). Dual regulation of diacylglycerol kinase (DGK)- $\theta$ : polybasic proteins promote activation by phospholipids and increase substrate affinity. *Journal of Biological Chemistry* *287*, 41619–41627.
